# Supplementary material for: A spatial and temporal assessment of microplastics in seafloor sediments: A case study for the UK
Source: Frontiers journal article supplement (doi:10.3389/fmars.2022.1093815), 2023-01-12
Supplement: Data_Sheet_1.pdf [file Data_Sheet_1.pdf]

## Supplementary Information

### A spatial and temporal assessment of microplastics in seafloor sediments: A case study for the UK.

Adil Bakir <sup>a</sup>, Denise Doran <sup>a</sup>, Briony Silburn <sup>a</sup>, Josie Russell <sup>a</sup>, Simeon Archer-Rand <sup>a</sup>, Jon Barry <sup>a</sup>, Thomas Maes <sup>b</sup>, Caroline Limpenny <sup>a</sup>, Claire Mason <sup>a</sup>, Jon Barber <sup>a</sup>, Manuel Nicolaus <sup>a</sup>.

<sup>a</sup> Centre for Environment, Fisheries and Aquaculture Science (Cefas), Pakefield Road, Lowestoft, Suffolk NR33 0HT, UK

<sup>b</sup> GRID-Arendal, Teaterplassen 3, 4836, Arendal, Norway

\*corresponding author: [adil.bakir@cefas.co.uk](mailto:adil.bakir@cefas.co.uk)

#### 1. Sample collection

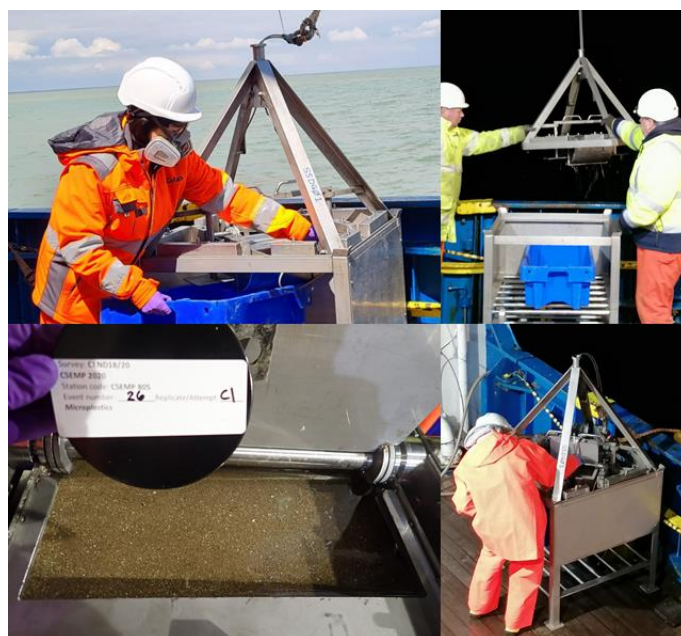

**Figure S1.** Collection of seafloor sediment samples on Cefas Endeavour research vessel.

A list of CSEMP sediment stations and corresponding locations can be found in Table S.1.

**Table S1.** CSEMP stations and corresponding locations

| Station          | Location        | UK regional seas                     | OSPAR region      | Sampling years                |
|------------------|-----------------|--------------------------------------|-------------------|-------------------------------|
| <b>CSEMP 245</b> | Off Tyne        | Northern North Sea                   | Greater North Sea | 2013, 2015*, 2017, 2019, 2021 |
| <b>CSEMP 285</b> | Off Tyne/Tees   | Northern North Sea                   | Greater North Sea | 2013, 2015, 2017, 2019, 2021  |
| <b>CSEMP 295</b> | Off Tees        | Northern North Sea                   | Greater North Sea | 2013, 2015*, 2017, 2019, 2021 |
| <b>CSEMP 345</b> | Off Humber/Wash | Northern North Sea                   | Greater North Sea | 2013, 2015, 2017, 2019, 2021  |
| <b>CSEMP 376</b> | Off Wash        | Southern North Sea                   | Greater North Sea | 2013, 2015, 2017, 2019, 2021  |
| <b>CSEMP 386</b> | Wash            | Southern North Sea                   | Greater North Sea | 2015, 2017, 2019, 2021        |
| <b>CSEMP 466</b> | Thames          | Southern North Sea                   | Greater North Sea | 2013, 2017, 2019, 2021        |
| <b>CSEMP 475</b> | Outer Gabbard   | Southern North Sea                   | Greater North Sea | 2013, 2015, 2021              |
| <b>CSEMP 484</b> | Dungeness       | English Channel                      | Greater North Sea | 2013, 2015, 2017, 2019, 2021  |
| <b>CSEMP 536</b> | Lyme Bay        | Western English Channel              | Greater North Sea | 2014, 2016, 2018, 2020        |
| <b>CSEMP 575</b> | Off Tamar       | Celtic Sea                           | Greater North Sea | 2014, 2016, 2018, 2020        |
| <b>CSEMP 605</b> | Celtic Deep     | Western English Channel & Celtic Sea | Celtic Sea        | 2014, 2016, 2018              |
| <b>CSEMP 655</b> | Cardigan Bay    | Irish Sea                            | Celtic Sea        | 2014, 2016, 2018, 2020        |
| <b>CSEMP 715</b> | Liverpool Bay   | Irish Sea                            | Celtic Sea        | 2014, 2016, 2018, 2020        |
| <b>CSEMP 805</b> | SE Isle of Man  | Irish Sea                            | Celtic Sea        | 2014, 2016, 2018, 2020        |

## 2. Contamination control procedures

Several contamination control procedures were also implemented while handling samples in the laboratory. Such procedures included:

- Use of glassware as much as possible
- Use of 100% cotton lab coats
- All samples were handled in a biological safety cabinet (BSC)
- All surfaces were cleaned with plastic free cloths
- Laboratory floors were vacuumed each day before carrying out any work
- All chemicals added to the samples were previously filtered onto a 0.2 µm regenerated cellulose (RC) filter
- Restricted laboratory access

## 3. Sample processing

Table S2. List of chemicals, manufacturers and suppliers

| Chemicals           | Molecular formula                                             | Manufacturer/Supplier                        | Purity (%)          |
|---------------------|---------------------------------------------------------------|----------------------------------------------|---------------------|
| Potassium hydroxide | KOH                                                           | VWR/VWR                                      | -                   |
| Sodium hypochlorite | NaClO                                                         | VWR/VWR                                      | 14% active chlorine |
| Hydrogen peroxide   | H <sub>2</sub> O <sub>2</sub>                                 | VWR/VWR                                      | 30%                 |
| Ethanol             | C <sub>2</sub> H <sub>6</sub> O                               | Acros<br>organics/ThermoFisher<br>scientific | 95% purity          |
| Nile Red            | C <sub>20</sub> H <sub>18</sub> N <sub>2</sub> O <sub>2</sub> | Acros<br>organics/ThermoFisher<br>scientific | 99% purity          |
| Zinc chloride       | ZnCl <sub>2</sub>                                             | VWR/VWR                                      | -                   |

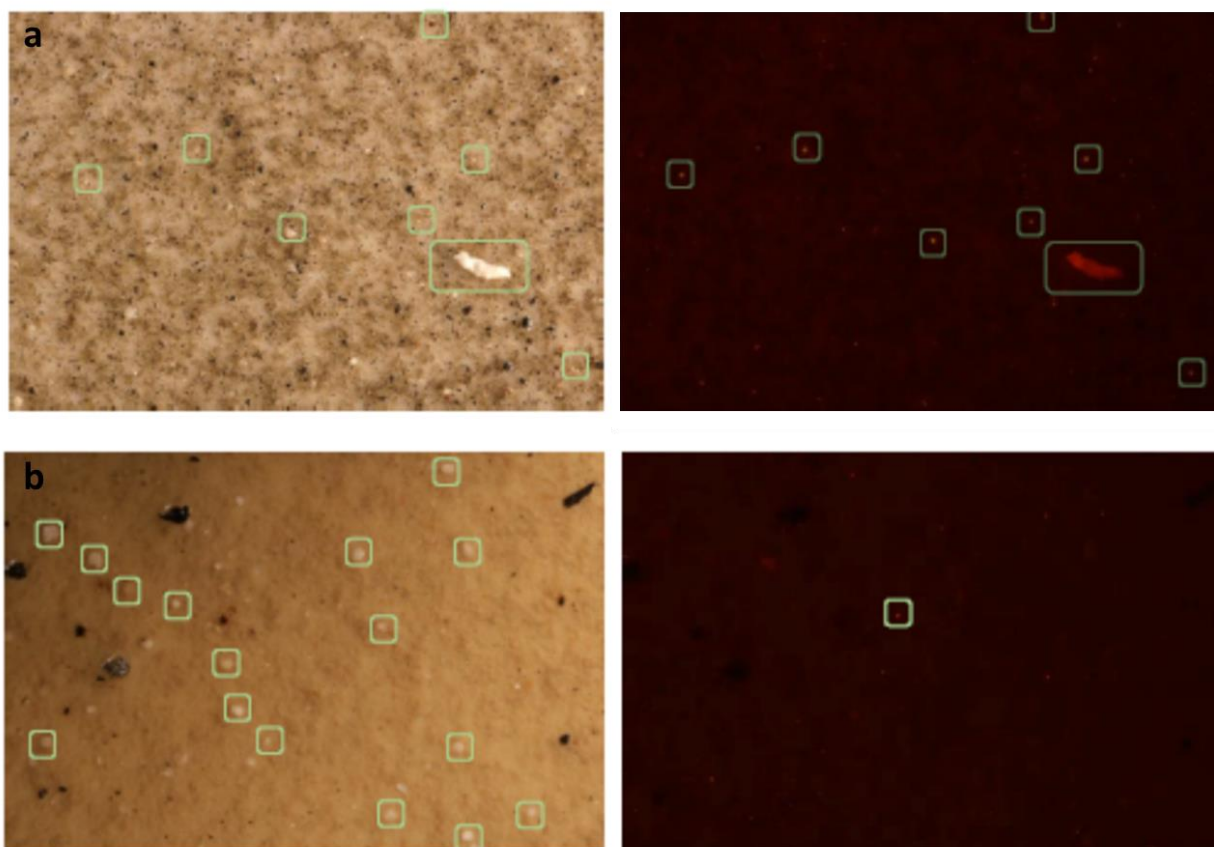

Figure S2. Chemical resistant biological items after staining using NR following (a) a 10% KOH digestion process at 40°C for 3 days and (b) a 30% v:v KOH:NaClO digestion process at 40°C for 3 days.

### 3.1 Density separation and microplastics recovery

**Table S3.** Polymeric materials used for density separation recovery studies.

| Supplier   | Polymer type | Characteristics | Particle type        | Size (μm) | Density (g cm <sup>-3</sup> ) | Spiked amount (number of items) |
|------------|--------------|-----------------|----------------------|-----------|-------------------------------|---------------------------------|
| Goodfellow | PA           | Opaque          | Spheres              | 1590      | 1.16                          | 10 x 2                          |
| Goodfellow | uPVC         | Opaque          | Fragments, spherical | Max. 250  | 1.3-1.45                      | 50 x 2                          |

| Supplier            | Polymer type | Characteristics | Particle type               | Size (µm)                        | Density (g cm <sup>-3</sup> ) | Spiked amount (number of items) |
|---------------------|--------------|-----------------|-----------------------------|----------------------------------|-------------------------------|---------------------------------|
| <b>Goodfellow s</b> | U.H.M.W . PE | Opaque          | Fragments , spherical       | Max. 150                         | 0.95                          | 50 x 2                          |
| <b>Goodfellow s</b> | PS           | Opaque          | Fragments , spherical       | 900                              | 1.05                          | 50 x 2                          |
| <b>Goodfellow s</b> | PP           | Transparent     | Sheet, 1 mm thick, shavings | ~ 500                            | 0.90                          | 50 x 2                          |
| <b>Amazon</b>       | PET          | White           | Fibre                       | ~ 2700 length<br>300 µm diameter | 1.39                          | 20 x 2                          |
| <b>Amazon</b>       | Nylon        | White           | Fibre                       | ~ 3951 length,<br>20µm diameter  | 1.14                          | 20 x 2                          |
| <b>Amazon</b>       | Nylon        | Yellow          | Fishing line                | ~ 536                            | 1.14                          | 50 x 2                          |

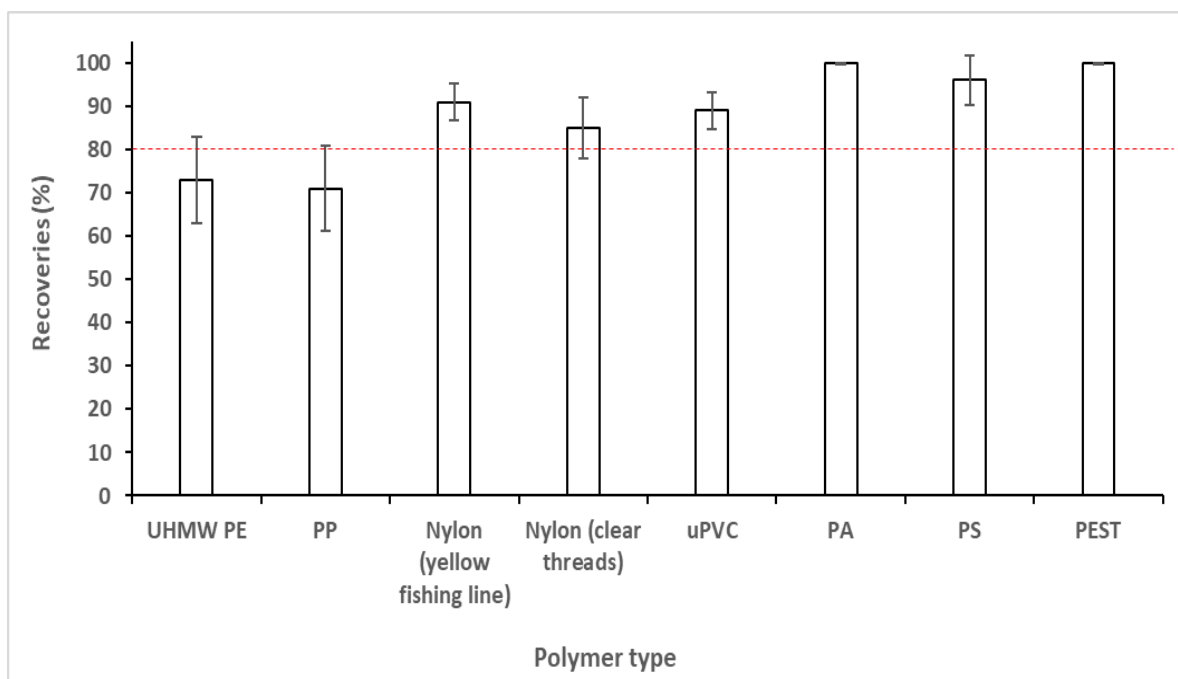

**Figure S3.** Polymer recoveries (%) from spiked clean sand using zinc chloride ( $1.5 \text{ g cm}^{-3}$ ).

#### 4. Quantification of microplastics

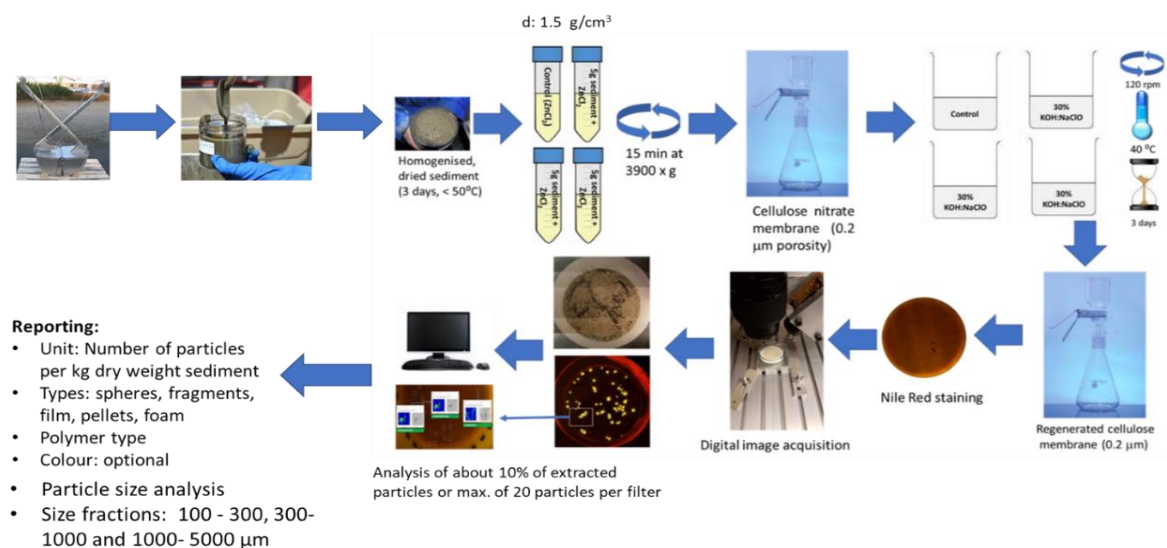

**Figure S4.** Schematic diagram of the protocol for the detection and quantification of microplastics in sediment samples.



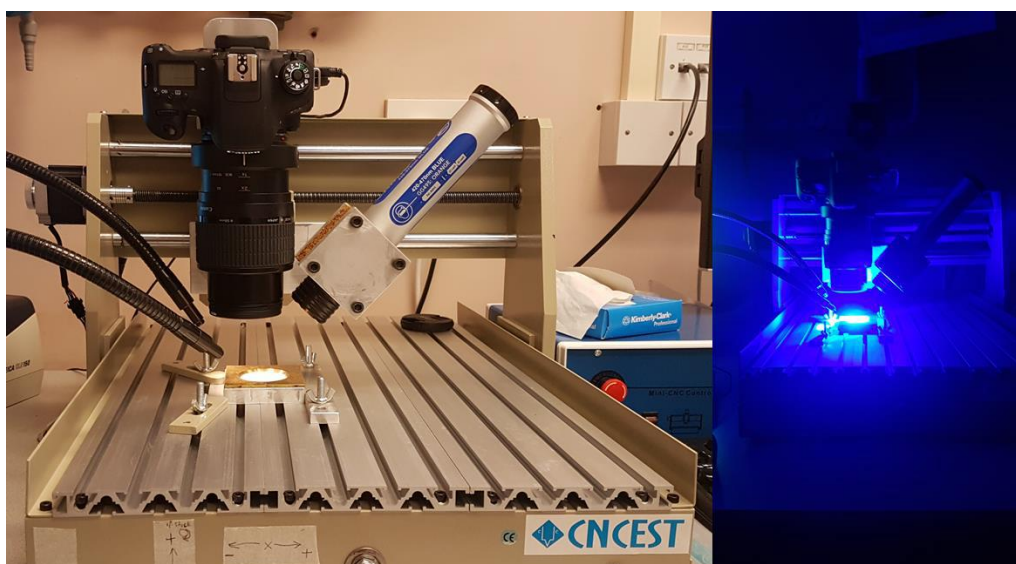

**Figure S5.** Experimental set-up of the digital imaging acquisition system using white light and blue light (420-470 nm).

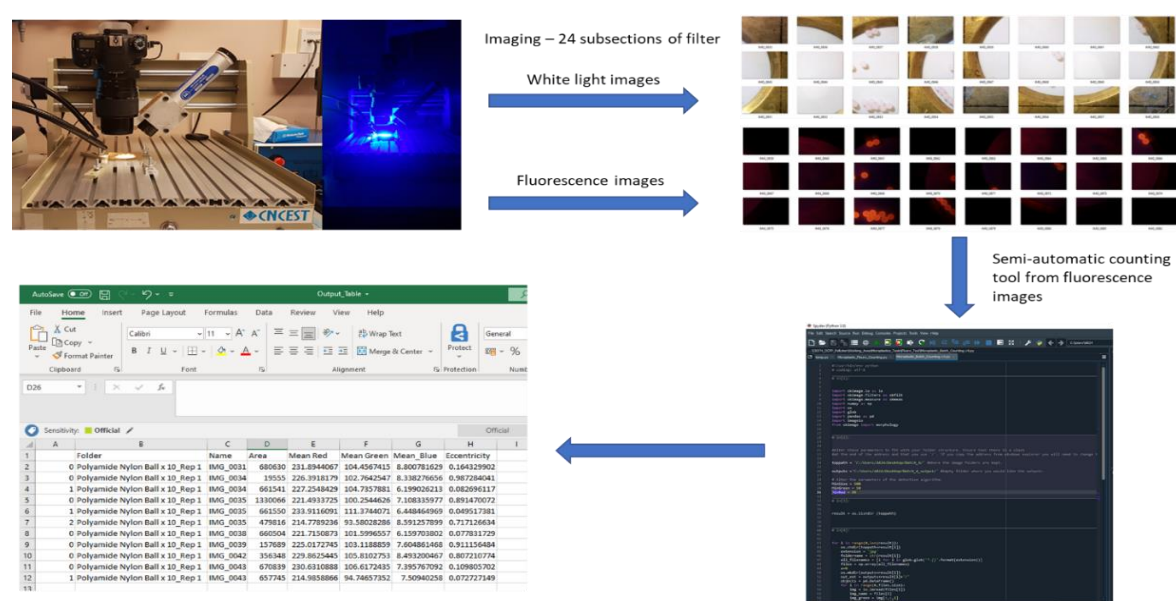

**Figure S6.** Schematic diagram of the protocol for the imaging and semi-automatic counting of fluorescent particles onto filters.

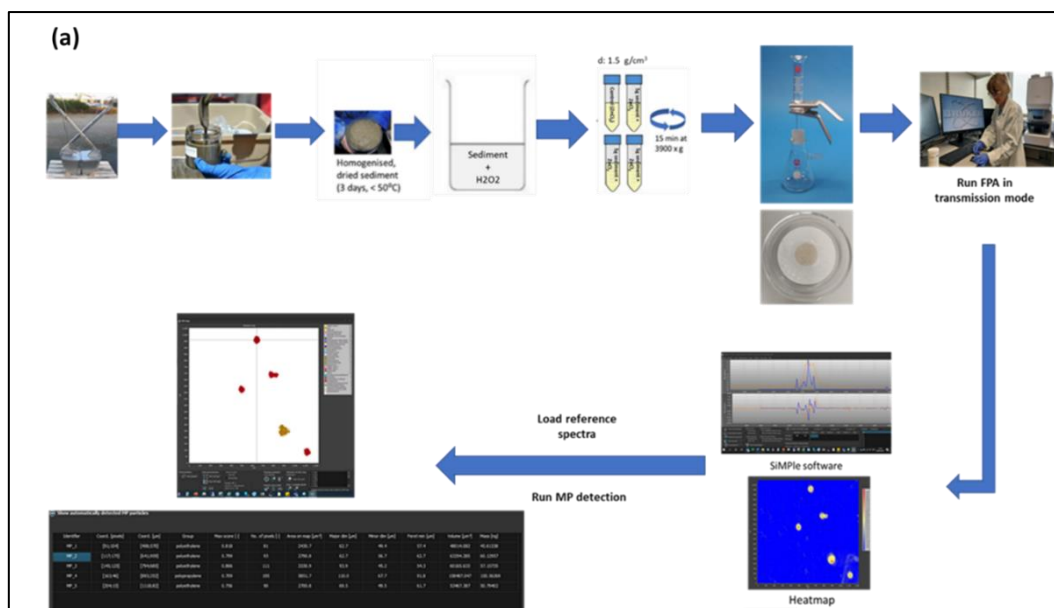

**Figure S7.** Schematic diagram of the protocol for the analysis of microplastics from sediment samples using micro-FTIR with focal plane array detector (FPA) following oxidative digestion on dry sediment.

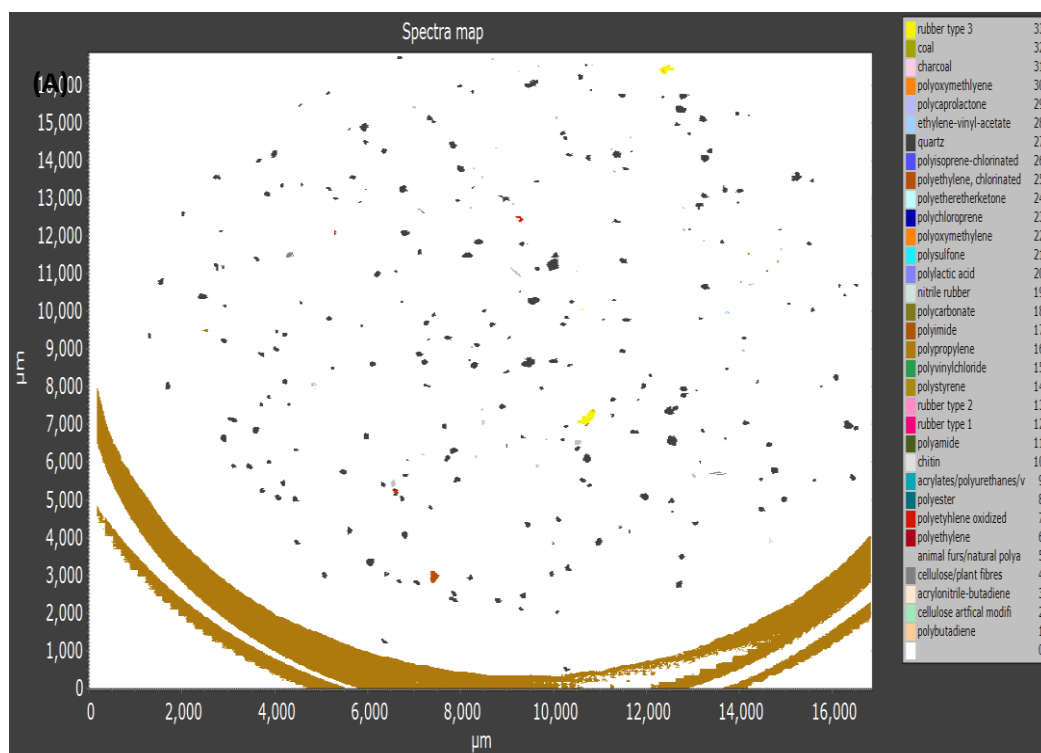



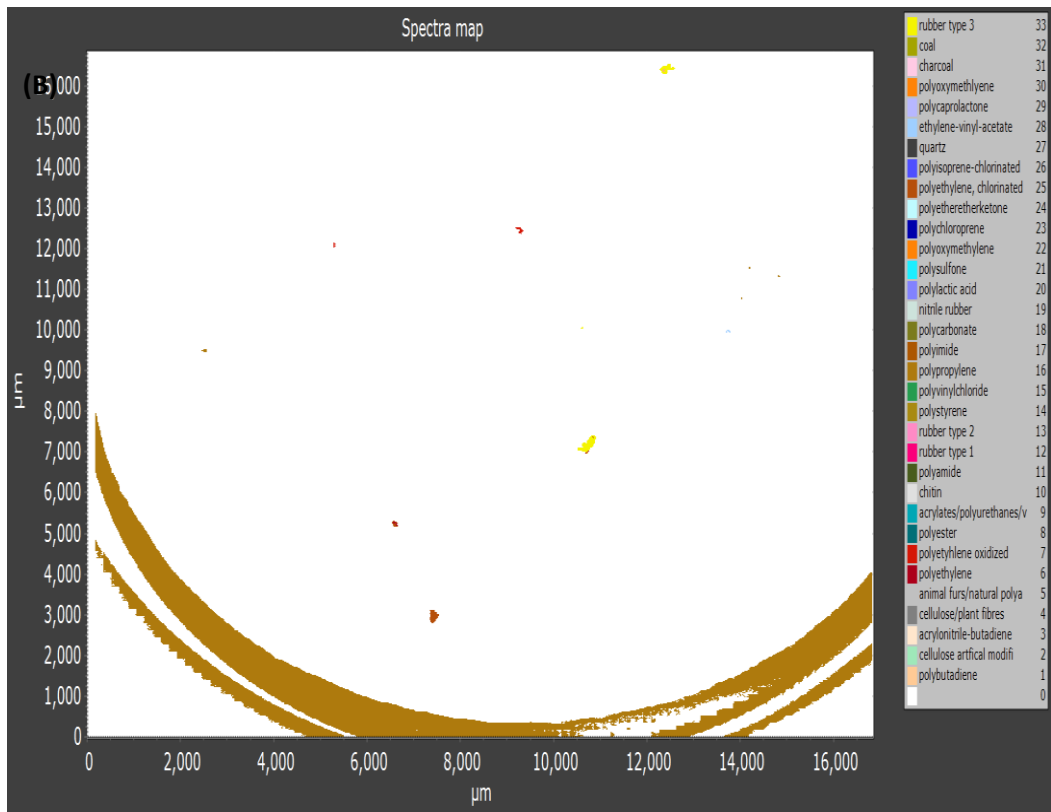

**Figure S8.** Example of particle mapping onto filter for (A) all particles and (B) microplastics (including rubbers) only.

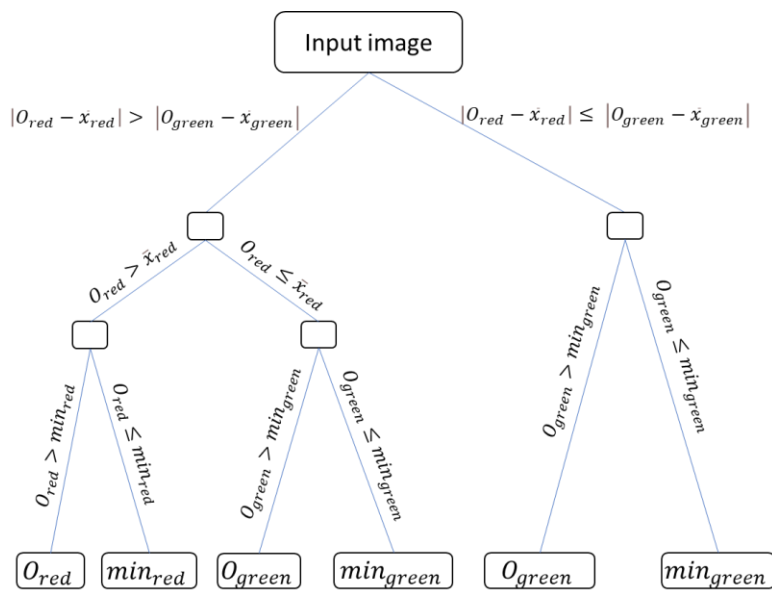

**Figure S9.** Decision tree used within the tool to pick which threshold to use to create the two classes. Where  $O_{red}$  is the Otsu threshold for the red band,  $O_{green}$  is the

Otsu threshold for the green band,  $\bar{x}_{\text{red}}$  is the mean value of the red band for the whole image,  $\bar{x}_{\text{green}}$  is the mean value of the green band for the whole image,  $\text{minred}$  is the user defined minimum red threshold and  $\text{mingreen}$  is the user defined minimum green threshold.

## 5. Contamination control procedures

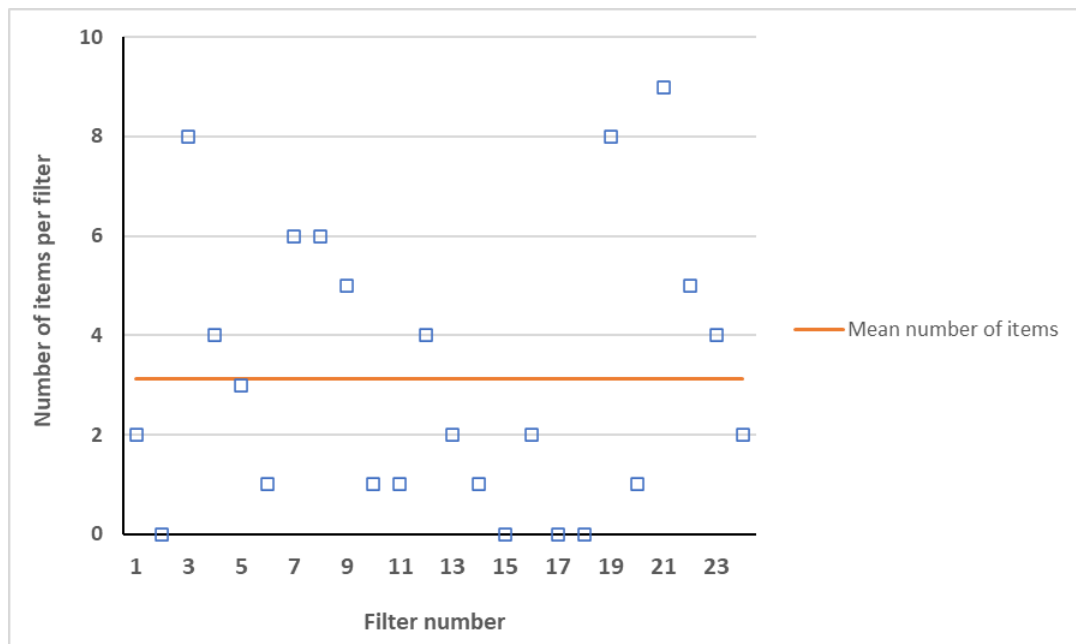

**Figure S10.** Number of items per filter for laboratory negative controls (n=24).

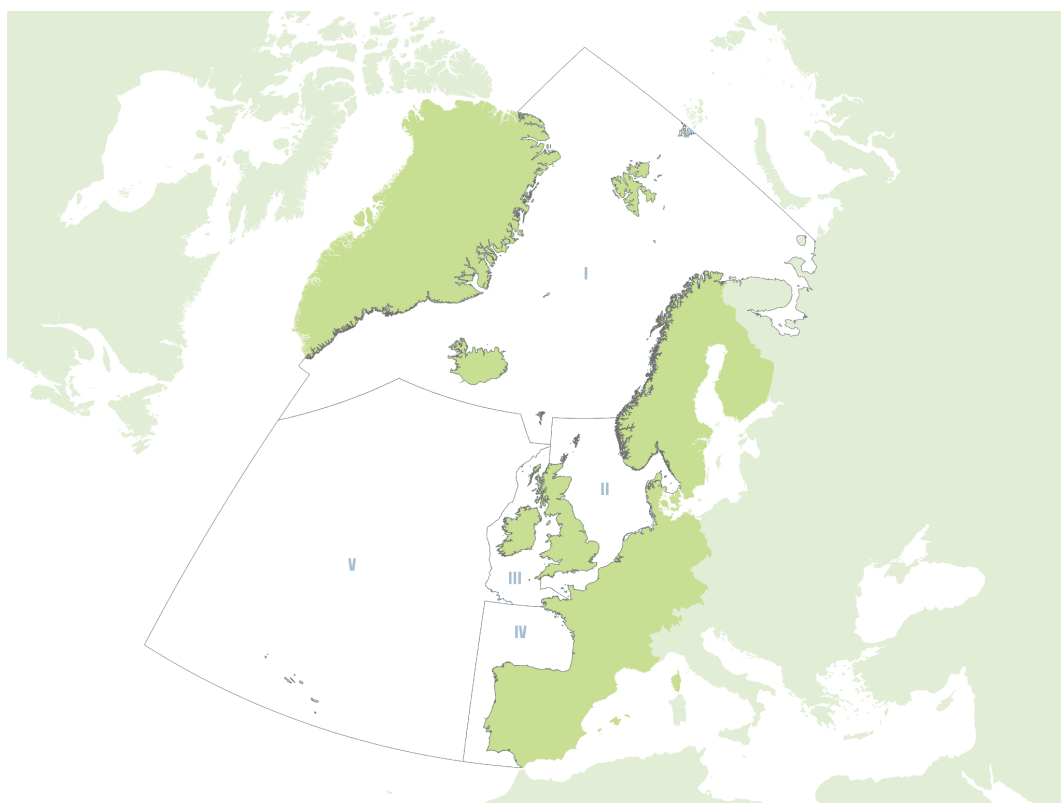

**Figure S11.** OSPAR regions. Region I: Arctic waters, II: Greater North Sea, III: Celtic Seas, IV: Bay of Biscay and Iberian Coast, V: Wider Atlantic.

## Coastal vs offshore stations

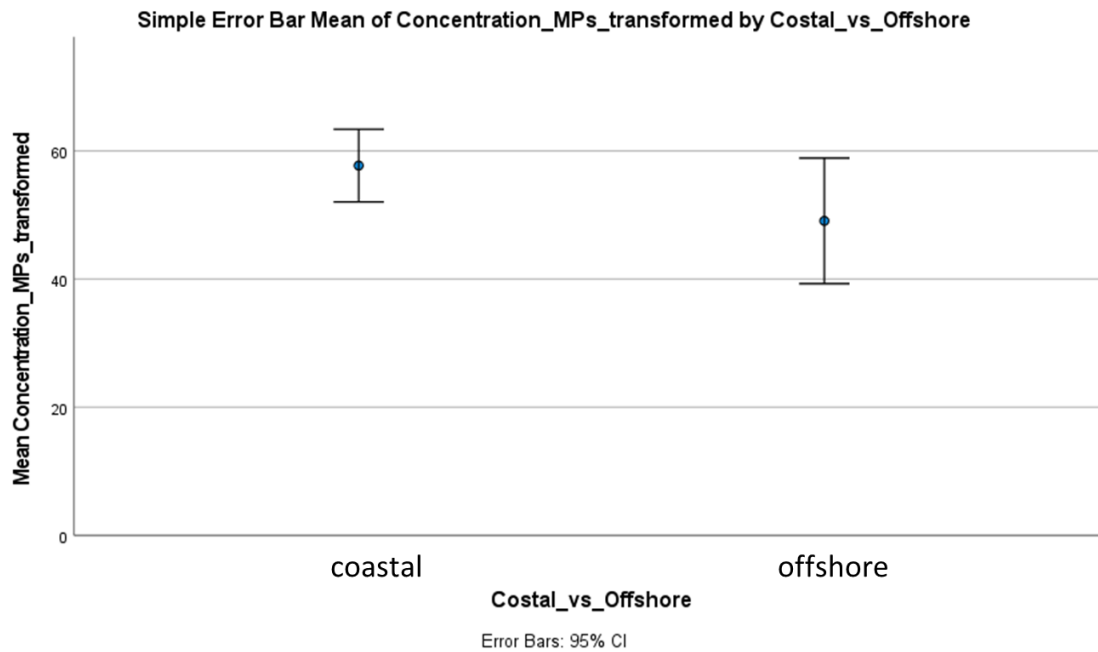

**Figure S12.** Plot of mean concentration of microplastics (data transformed) from coastal and offshore locations.

**Table S4.** One-Way ANOVA output for the investigation of differences for the abundance of microplastics from seafloor sediments from coastal to offshore locations.

| ANOVA                         |                |     |             |       |      |
|-------------------------------|----------------|-----|-------------|-------|------|
| Concentration_MPs_transformed |                |     |             |       |      |
|                               | Sum of Squares | df  | Mean Square | F     | Sig. |
| Between Groups                | 3052.468       | 1   | 3052.468    | 2.591 | .109 |
| Within Groups                 | 220270.089     | 187 | 1177.915    |       |      |
| Total                         | 223322.557     | 188 |             |       |      |

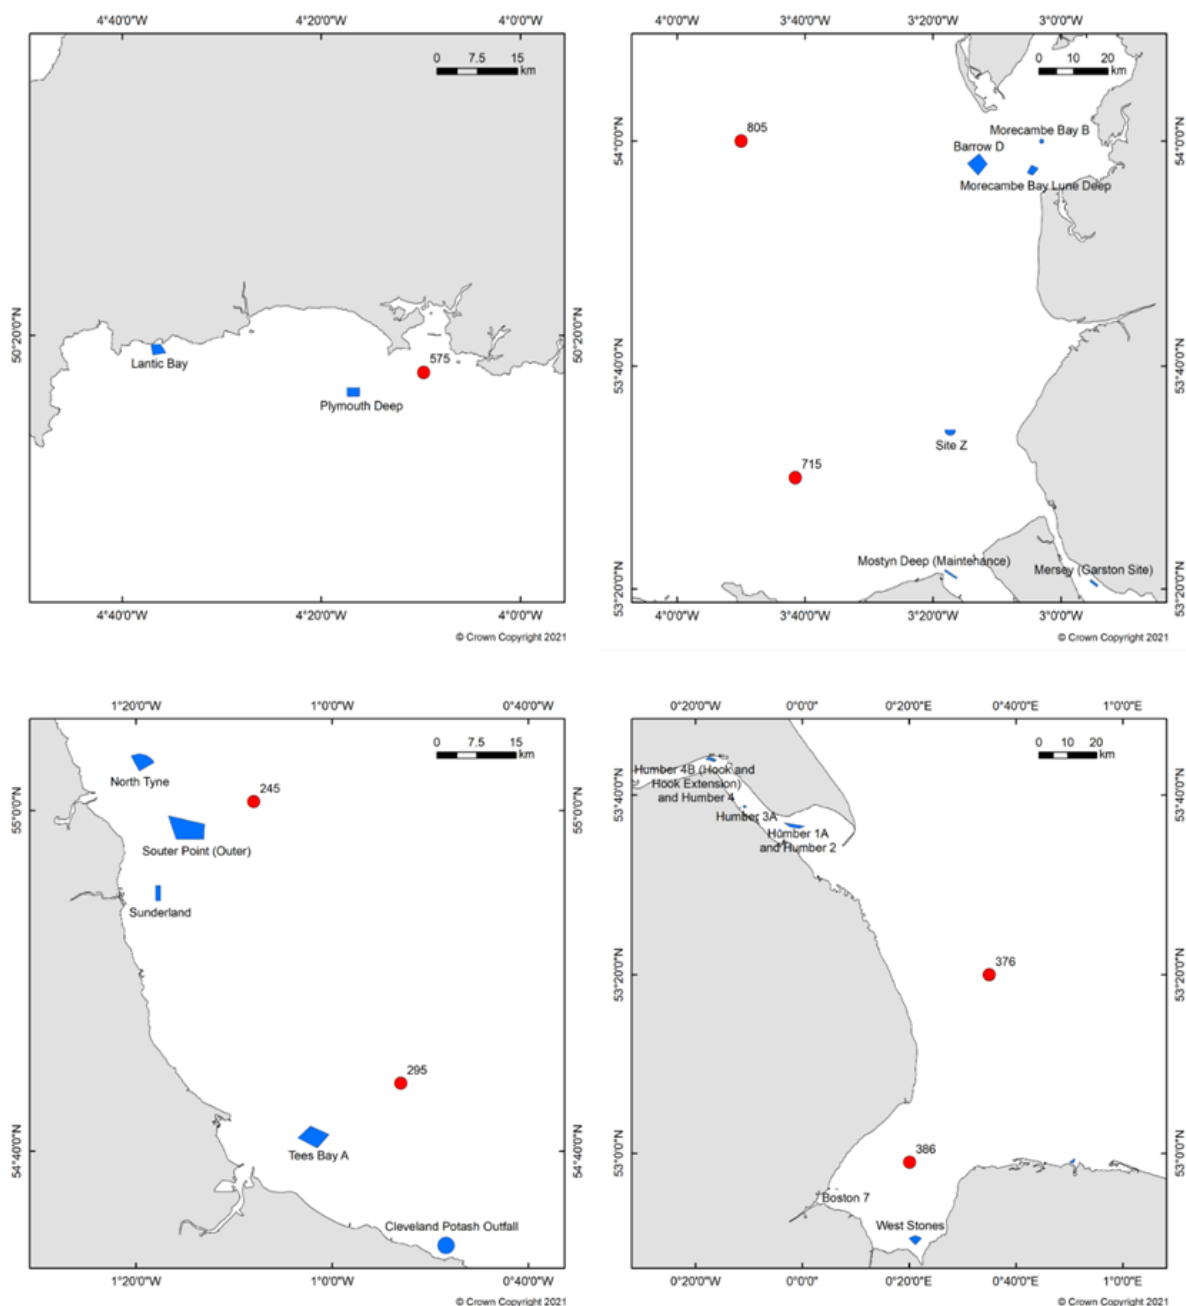

**Figure S13.** Location of near-shore CSEMP sediment monitoring stations to dredge disposal sites.

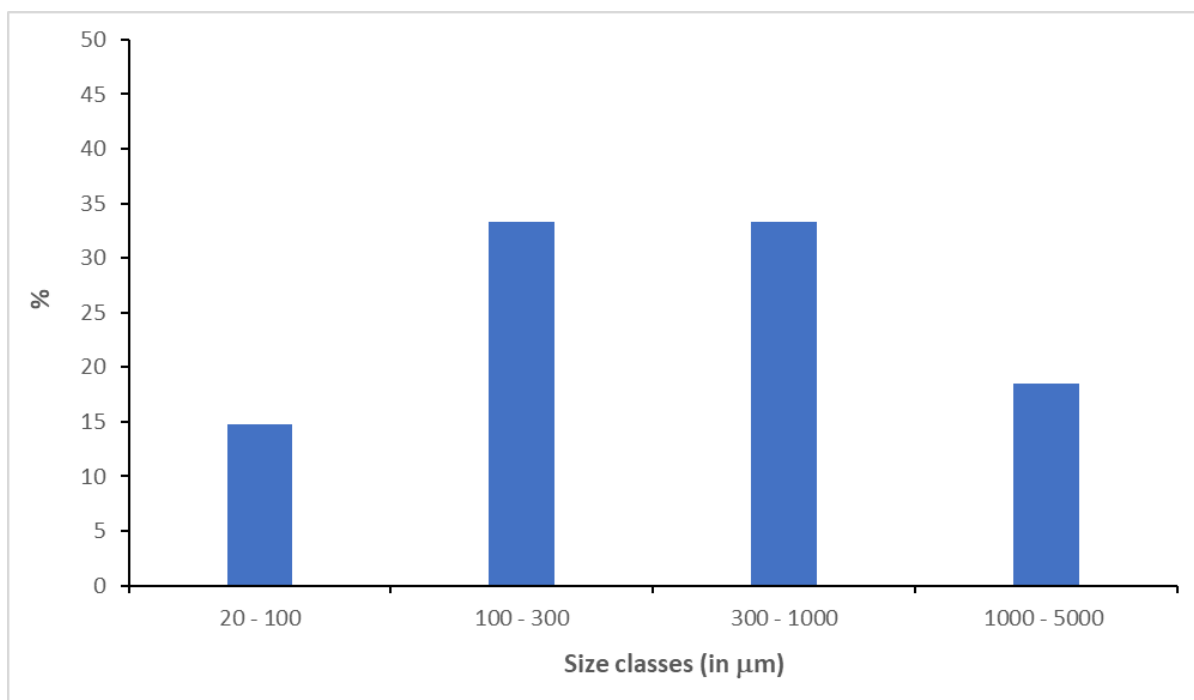

**Figure S14.** Microplastics analysed using  $\mu$ -FTIR categorised per size classes (n=27).

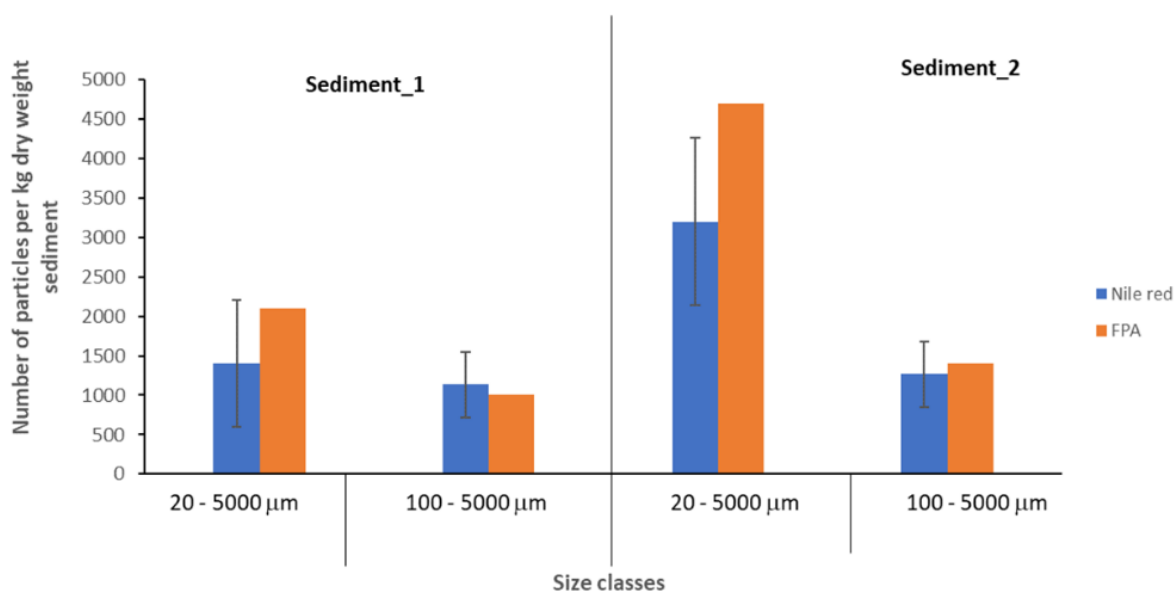

**Figure S15.** Number of particles per kg dry weight sediment for 2 marine Dutch sediments using two analytical techniques: i) Nile red tagging of polymers coupled with automatic counting and micro-FTIR and ii) Focal plane array detector-based micro-Fourier-transform infrared imaging (Bakir, 2022).



**Table S5.** Microplastics analysis from micro-FTIR-FPA and comparison to NR output.

| Sampling year | Station number | Sediment type    | Number of microplastics on filters from FPA | Polymer type          | Size fraction (µm)<br>[min – max] | Mean number of microplastics on filters from NR technique*<br><br>(mean ± SD; n=3) |
|---------------|----------------|------------------|---------------------------------------------|-----------------------|-----------------------------------|------------------------------------------------------------------------------------|
| 2019          | 386            | High % sand      | 300                                         | PP, PE                | 84 - 1920                         | 200 ± 200                                                                          |
| 2019          | 484            | High % sand      | 1,500                                       | PP, PA                | 44 - 284                          | 2,200 ± 721                                                                        |
| 2019          | 466            | High % sand      | 700                                         | PP, PA                | 67 - 112                          | 800 ± 1,058                                                                        |
| 2020          | 805            | High % sand      | 1,400                                       | CA (modified), PP, PA | 22 – 140                          | 2,067 ± 945                                                                        |
| 2021          | 475            | High % sand      | 400                                         | PP                    | 37 - 88                           | 67 ± 115                                                                           |
| 2021          | 285            | High % sand      | 900                                         | PP, PE                | 30 - 1920                         | 533 ± 924                                                                          |
| 2021          | 295            | High % sand      | 1,500                                       | Rubber type3, PE, PP  | 23 – 214                          | 733 ± 306                                                                          |
| 2021          | 484            | High % silt/clay | 2,100                                       | PE, PP, EVA, Rubber   | 24 - 503                          | 2,200 ± 0.01                                                                       |

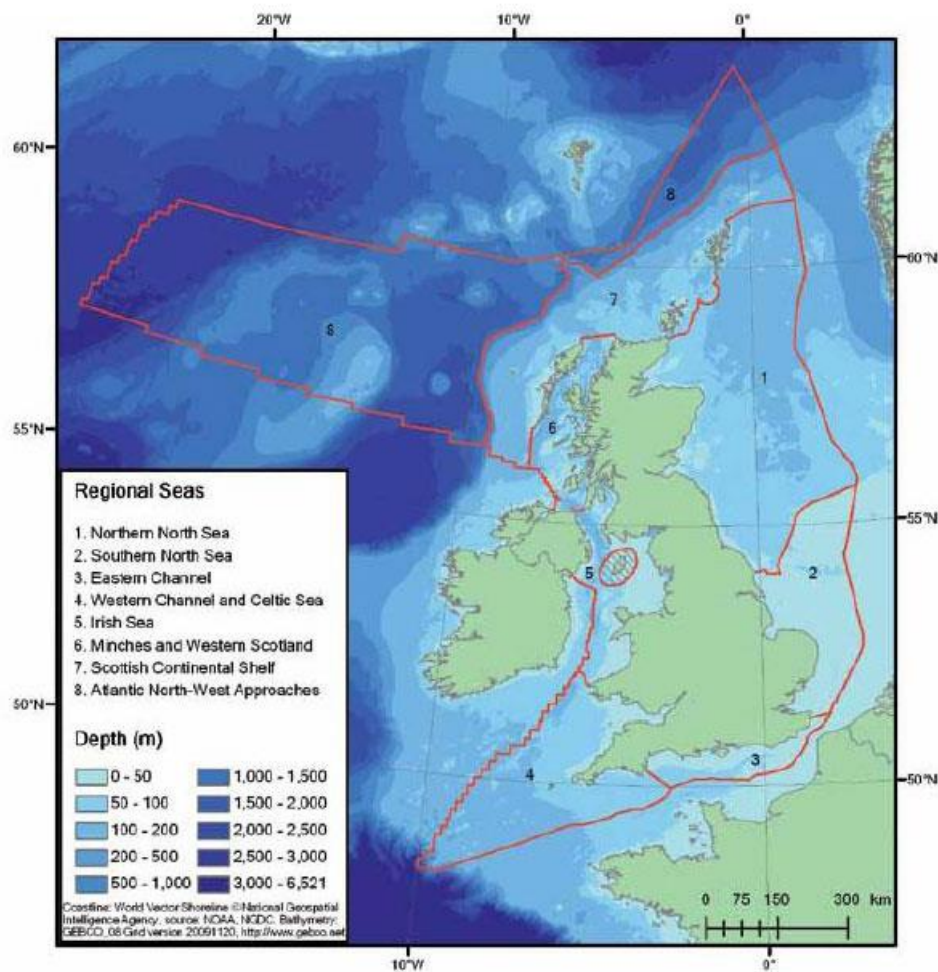

**Figure S16.** Charting Progress 2 Regional Sea boundaries (UKMMAS, 2010).

## 6. ANOVAs statistical outputs

- 2021

### ANOVA

SQRT\_conc

|                | Sum of Squares | df | Mean Square | F      | Sig.  |
|----------------|----------------|----|-------------|--------|-------|
| Between Groups | 18675.797      | 8  | 2334.475    | 20.454 | <.001 |
| Within Groups  | 2054.404       | 18 | 114.134     |        |       |
| Total          | 20730.201      | 26 |             |        |       |

### SQRT\_conc

Tukey HSD<sup>a</sup>

| CSEMP_station | N | Subset for alpha = 0.05 |         |         |         |
|---------------|---|-------------------------|---------|---------|---------|
|               |   | 1                       | 2       | 3       | 4       |
| 475           | 3 | .0000                   |         |         |         |
| 285           | 3 | 13.3333                 |         |         |         |
| 295           | 3 | 26.6357                 | 26.6357 |         |         |
| 484           | 3 |                         | 46.9042 | 46.9042 |         |
| 466           | 3 |                         |         | 60.3227 | 60.3227 |
| 386           | 3 |                         |         | 62.2904 | 62.2904 |
| 245           | 3 |                         |         | 65.0522 | 65.0522 |
| 376           | 3 |                         |         | 67.4254 | 67.4254 |
| 345           | 3 |                         |         |         | 83.2531 |
| Sig.          |   | .117                    | .378    | .364    | .241    |

Means for groups in homogeneous subsets are displayed.

a. Uses Harmonic Mean Sample Size = 3.000.

- 2020

### ANOVA

SQRT\_conc\_2020

|                | Sum of Squares | df | Mean Square | F      | Sig.  |
|----------------|----------------|----|-------------|--------|-------|
| Between Groups | 9811.032       | 4  | 2452.758    | 18.843 | <.001 |
| Within Groups  | 1301.693       | 10 | 130.169     |        |       |
| Total          | 11112.725      | 14 |             |        |       |

### SQRT\_conc\_2020

Tukey HSD<sup>a</sup>

| CSEMP_station_2020 | N | Subset for alpha = 0.05 |         |         |
|--------------------|---|-------------------------|---------|---------|
|                    |   | 1                       | 2       | 3       |
| 715                | 3 | 6.6667                  |         |         |
| 575                | 3 |                         | 43.5117 |         |
| 805                | 3 |                         | 44.5092 |         |
| 536                | 3 |                         | 73.2696 | 73.2696 |
| 655                | 3 |                         |         | 77.9673 |
| Sig.               |   | 1.000                   | .058    | .985    |

Means for groups in homogeneous subsets are displayed.

a. Uses Harmonic Mean Sample Size = 3.000.

- 2019

### ANOVA

SQRT\_conc\_2019

|                | Sum of Squares | df | Mean Square | F      | Sig.  |
|----------------|----------------|----|-------------|--------|-------|
| Between Groups | 14889.557      | 7  | 2127.080    | 17.082 | <.001 |
| Within Groups  | 1992.355       | 16 | 124.522     |        |       |
| Total          | 16881.913      | 23 |             |        |       |

### SQRT\_conc\_2019

Tukey HSD<sup>a</sup>

| CSEMP_station_2019 | N | Subset for alpha = 0.05 |         |         |         |
|--------------------|---|-------------------------|---------|---------|---------|
|                    |   | 1                       | 2       | 3       | 4       |
| 285                | 3 | 11.3807                 |         |         |         |
| 386                | 3 | 11.3807                 |         |         |         |
| 466                | 3 | 21.5738                 | 21.5738 |         |         |
| 345                | 3 | 31.7352                 | 31.7352 |         |         |
| 484                | 3 |                         | 46.4405 | 46.4405 |         |
| 295                | 3 |                         | 48.2338 | 48.2338 |         |
| 376                | 3 |                         |         | 70.5586 | 70.5586 |
| 245                | 3 |                         |         |         | 83.3220 |
| Sig.               |   | .383                    | .132    | .209    | .844    |

Means for groups in homogeneous subsets are displayed.

a. Uses Harmonic Mean Sample Size = 3.000.

- 2018

### ANOVA

SQRT\_conc\_2018

|                | Sum of Squares | df | Mean Square | F      | Sig.  |
|----------------|----------------|----|-------------|--------|-------|
| Between Groups | 16985.802      | 5  | 3397.160    | 20.363 | <.001 |
| Within Groups  | 2002.002       | 12 | 166.834     |        |       |
| Total          | 18987.804      | 17 |             |        |       |

### SQRT\_conc\_2018

Tukey HSD<sup>a</sup>

| CSEMP_station_2018 | N | Subset for alpha = 0.05 |         |          |
|--------------------|---|-------------------------|---------|----------|
|                    |   | 1                       | 2       | 3        |
| 715                | 3 | 18.8562                 |         |          |
| 805                | 3 | 27.7272                 | 27.7272 |          |
| 605                | 3 | 40.7324                 | 40.7324 |          |
| 575                | 3 | 43.4439                 | 43.4439 |          |
| 536                | 3 |                         | 59.5223 |          |
| 655                | 3 |                         |         | 113.0733 |
| Sig.               |   | .254                    | .088    | 1.000    |

Means for groups in homogeneous subsets are displayed.

a. Uses Harmonic Mean Sample Size = 3.000.

- 2017

### ANOVA

SQRT\_conc\_2017

|                | Sum of Squares | df | Mean Square | F      | Sig.  |
|----------------|----------------|----|-------------|--------|-------|
| Between Groups | 45194.582      | 7  | 6456.369    | 34.886 | <.001 |
| Within Groups  | 2961.115       | 16 | 185.070     |        |       |
| Total          | 48155.697      | 23 |             |        |       |

### SQRT\_conc\_2017

Tukey HSD<sup>a</sup>

| CSEMP_station_2017 | N | Subset for alpha = 0.05 |         |         |          |          |
|--------------------|---|-------------------------|---------|---------|----------|----------|
|                    |   | 1                       | 2       | 3       | 4        | 5        |
| 285                | 3 | .0000                   |         |         |          |          |
| 386                | 3 | 29.4281                 | 29.4281 |         |          |          |
| 466                | 3 |                         | 50.1838 | 50.1838 |          |          |
| 376                | 3 |                         | 58.5035 | 58.5035 |          |          |
| 295                | 3 |                         | 59.6045 | 59.6045 |          |          |
| 345                | 3 |                         |         | 78.4986 | 78.4986  |          |
| 484                | 3 |                         |         |         | 105.6001 |          |
| 245                | 3 |                         |         |         |          | 151.4588 |
| Sig.               |   | .208                    | .187    | .243    | .287     | 1.000    |

Means for groups in homogeneous subsets are displayed.

a. Uses Harmonic Mean Sample Size = 3.000.

- 2016

### ANOVA

SQRT\_conc\_2016

|                | Sum of Squares | df | Mean Square | F    | Sig. |
|----------------|----------------|----|-------------|------|------|
| Between Groups | 1464.603       | 5  | 292.921     | .643 | .672 |
| Within Groups  | 5468.821       | 12 | 455.735     |      |      |
| Total          | 6933.424       | 17 |             |      |      |

### SQRT\_conc\_2016

Tukey HSD<sup>a</sup>

| CSEMP_station_2016 | N | Subset for<br>alpha = 0.05<br>1 |
|--------------------|---|---------------------------------|
| 805                | 3 | 11.3807                         |
| 536                | 3 | 25.7580                         |
| 655                | 3 | 29.4689                         |
| 715                | 3 | 30.9835                         |
| 605                | 3 | 37.2361                         |
| 575                | 3 | 38.7617                         |
| Sig.               |   | .630                            |

Means for groups in homogeneous subsets are displayed.

a. Uses Harmonic Mean Sample Size = 3.000.

- 2015

### ANOVA

SQRT\_conc\_2015

|                | Sum of Squares | df | Mean Square | F     | Sig. |
|----------------|----------------|----|-------------|-------|------|
| Between Groups | 4038.033       | 5  | 807.607     | 3.399 | .038 |
| Within Groups  | 2851.270       | 12 | 237.606     |       |      |
| Total          | 6889.303       | 17 |             |       |      |



### SQRT\_conc\_2015

Tukey HSD<sup>a</sup>

| CSEMP_station_2015 | N | Subset for alpha = 0.05 |         |
|--------------------|---|-------------------------|---------|
|                    |   | 1                       | 2       |
| 285                | 3 | 49.5973                 |         |
| 484                | 3 | 64.5637                 | 64.5637 |
| 475                | 3 | 69.8225                 | 69.8225 |
| 386                | 3 | 77.0530                 | 77.0530 |
| 376                | 3 | 89.1713                 | 89.1713 |
| 345                | 3 |                         | 94.1135 |
| Sig.               |   | .071                    | .248    |

Means for groups in homogeneous subsets are displayed.

a. Uses Harmonic Mean Sample Size = 3.000.

- 2014

### ANOVA

SQRT\_conc\_2014

|                | Sum of Squares | df | Mean Square | F     | Sig. |
|----------------|----------------|----|-------------|-------|------|
| Between Groups | 12418.113      | 5  | 2483.623    | 6.688 | .003 |
| Within Groups  | 4456.325       | 12 | 371.360     |       |      |
| Total          | 16874.439      | 17 |             |       |      |

### SQRT\_conc\_2014

Tukey HSD<sup>a</sup>

| CSEMP_station_2014 | N | Subset for alpha = 0.05 |         |
|--------------------|---|-------------------------|---------|
|                    |   | 1                       | 2       |
| 715                | 3 | 13.3333                 |         |
| 605                | 3 | 37.9202                 | 37.9202 |
| 536                | 3 |                         | 77.4525 |
| 805                | 3 |                         | 77.6554 |
| 655                | 3 |                         | 80.5917 |
| 575                | 3 |                         | 81.0837 |
| Sig.               |   | .635                    | .137    |

Means for groups in homogeneous subsets are displayed.

a. Uses Harmonic Mean Sample Size = 3.000.

- 2013

### ANOVA

SQRT\_conc\_2013

|                | Sum of Squares | df | Mean Square | F     | Sig.  |
|----------------|----------------|----|-------------|-------|-------|
| Between Groups | 29425.080      | 7  | 4203.583    | 8.782 | <.001 |
| Within Groups  | 7658.915       | 16 | 478.682     |       |       |
| Total          | 37083.995      | 23 |             |       |       |

### SQRT\_conc\_2013

Tukey HSD<sup>a</sup>

| CSEMP_station_2013 | N | Subset for alpha = 0.05 |         |          |
|--------------------|---|-------------------------|---------|----------|
|                    |   | 1                       | 2       | 3        |
| 484                | 3 | 24.4260                 |         |          |
| 295                | 3 | 46.0508                 | 46.0508 |          |
| 466                | 3 | 50.7878                 | 50.7878 |          |
| 285                | 3 | 62.1498                 | 62.1498 |          |
| 475                | 3 | 63.2317                 | 63.2317 |          |
| 376                | 3 | 78.4372                 | 78.4372 |          |
| 245                | 3 |                         | 95.5109 | 95.5109  |
| 345                | 3 |                         |         | 147.2461 |
| Sig.               |   | .111                    | .171    | .138     |

Means for groups in homogeneous subsets are displayed.

a. Uses Harmonic Mean Sample Size = 3.000.

## 7. References

- Bakir, A. (2022). *Monitoring of microplastics in Dutch marine sediments: a pilot study*. [https://puc.overheid.nl/rijkswaterstaat/doc/PUC\\_707712\\_31/1/](https://puc.overheid.nl/rijkswaterstaat/doc/PUC_707712_31/1/)
- UKMMAS. (2010). *Charting Progress 2 - An assessment of the state of UK seas*.
